# Supplementary material for: Interactions between Bacteriophage, Bacteria, and the Mammalian Immune System
Source: Viruses. 2018 Dec 25;11(1):10. doi: 10.3390/v11010010 (PMC6356784; doi:10.3390/v11010010)
Supplement: Supplementary file 1 [file viruses-11-00010-s001.pdf]

## The forgotten viruses – depicting bacteriophage interactions with human cells

---

Jonas D. Van Belleghem<sup>1</sup>, Krystyna Dąbrowska<sup>2</sup>, Mario Vaneechoutte<sup>1</sup> and Jeremy J. Barr<sup>3</sup>

<sup>1</sup> Laboratory Bacteriology Research, Department of Clinical Chemistry, Microbiology and Immunology, University Ghent, Medical Research Building II, Corneel Heymanslaan 10, 9000, Ghent, Belgium.

<sup>2</sup> Bacteriophage Laboratory, Institute of Immunology and Experimental Therapy, Polish Academy of Sciences, Weigla 12, 53-114 Wrocław, Poland

<sup>3</sup> School of Biological Sciences, Monash University, Melbourne, VIC, 3800, Australia

### *In silico* model

The addition of anti-inflammatory phage properties in the *in silico* models, described by Leung and Weitz (2017), and Hodyra-Stefaniak *et al.* (2015), provides the phage with an increased survival rate. Therefore, we propose to expand the equation of the innate immune response (Table 1 - Equation 3), to include the effect of phages on the innate immune response ( $X_P$ ). We propose to divide the initial equation describing the innate immune response ( $I$ ) into two parts (Table 1 – Equation 4-9), one part describing the effect of bacteria towards the innate immune response ( $X_S$ ; Table 1 – Equation 4-6) and the other one describing the effect of phages on the innate immune response ( $X_P$ ; Table 1 – Equation 7-9). Furthermore, additional constraints were given to the mathematical model. When the phage concentration ( $P$ ) is larger than the critical phage concentration ( $P_C$ ), the decay rate ( $\gamma_{dp}$ ) approaches one. The critical phage concentration ( $P_C$ ) is the phage concentration needed in order for the phage to induce an anti-inflammatory response and reduce the innate immune response.

21 **Supplementary tables:**

22 **Table 1: Generalized model describing the phage-bacteria-immune response interaction.** The  
 23 Hodyra-Stefaniak *in-silico* model was expanded to include the anti-inflammatory properties of phages. The  
 24 dynamics of bacteria, phage, innate and adaptive immunity and their interactions are described by differential  
 25 equations. When the concentration of bacterial cells exceeds the threshold  $S_c$  and resources are unlimited, the  
 26 concentration of innate system particles grows exponentially with a constant rate of  $a_I$ . When the phage  
 27 concentration exceeds the threshold  $P_c$  and resources are unlimited, the concentration of the innate particles  
 28 decreases at a constant rate of  $\gamma_g$ , ultimately approaching one.

**S: Growth of the bacterial population**

$$\frac{dS(t)}{dt} = a_S S(t) - \rho S(t)P(t) - \kappa_{SI} S(t)I(t) - \kappa_{SB} S(t)B(t) \quad (1)$$

**P: Dynamics of a free phage population**

$$\frac{dP(t)}{dt} = b\rho S(t - \lambda)P(t - \lambda) - \rho S(t)P(t) - \kappa_{PI} P(t)I(t) - \kappa_{PA} P(t)A(t) \quad (2)$$

**I: Innate immune response**

$$\frac{dI}{dt} = (X_S(t) + X_P(t))I(t) \quad (3)$$

**$X_S$ : Bacterial component of the innate immune response**

**$X_P$ : Phage component of the innate immune response**

$$X_S = \begin{cases} a_I \gamma_{gS}(t) & \text{for } S(t) \geq S_c, \\ -d_I \gamma_{aS}(t) & \text{otherwise} \end{cases} \quad (4) \quad X_P = \begin{cases} -d_I \gamma_{dP}(t) & \text{for } P(t) \geq P_c, \\ a_I \gamma_{gP}(t) & \text{otherwise} \end{cases} \quad (7)$$

Where

$$\gamma_{gS}(t) = \left(1 + \frac{S_c}{k_I}\right) \left(\frac{S(t)}{S(t) + k_I}\right) - \frac{S_c}{k_I}, \quad (5) \quad \gamma_{gP}(t) = \left(1 + \frac{P_c}{k_I}\right) \left(\frac{P(t)}{P(t) + k_I}\right) - \frac{P_c}{k_I}, \quad (8)$$

And

$$\gamma_{aS}(t) = \sqrt{1 - \frac{S(t)}{S_c}} \quad (6) \quad \gamma_{dP}(t) = \sqrt{1 - \frac{P_c}{P(t)}} \quad (9)$$

**A: Dynamics of adaptive immune response against phage**

$$\frac{dA(t)}{d(t)} = a_A \left(\frac{P(t)}{P(t) + k_A}\right) A(t) \left(1 - \frac{A(t)}{A_{max}}\right) \quad (10)$$

**B: Dynamics of adaptive immune response against bacteria**

$$\frac{dB(t)}{d(t)} = a_B \left(\frac{S(t)}{S(t) + k_B}\right) B(t) \left(1 - \frac{B(t)}{B_{max}}\right) \quad (11)$$

29

Table 2: State variable and parameters of the models described in Table 1.

| State variable          |                                                                             |                        | Figure number   |                 |                 |                 |                 |                 |                 |                 |                 |
|-------------------------|-----------------------------------------------------------------------------|------------------------|-----------------|-----------------|-----------------|-----------------|-----------------|-----------------|-----------------|-----------------|-----------------|
|                         |                                                                             |                        | A               | B               | C               | D               | E               | F               | G               | H               | I               |
| <b>S</b>                | Concentration of susceptible bacteria                                       | Cfu/ml                 | 3000            | 3000            | 3000            | 3000            | 3000            | $3 \times 10^5$ | $3 \times 10^5$ | $3 \times 10^5$ | $3 \times 10^5$ |
| <b>P(t<sub>p</sub>)</b> | Concentration of phage on time point p                                      | Pfu/ml                 | $2 \times 10^5$ | $2 \times 10^5$ | $2 \times 10^5$ | $2 \times 10^8$ | $2 \times 10^8$ | $2 \times 10^4$ | $2 \times 10^4$ | $2 \times 10^5$ | $2 \times 10^5$ |
| <b>I</b>                | Concentration of particles of the innate immune response                    | Particles/ml           | 100             | 100             | 100             | 100             | 100             | 100             | 100             | 100             | 100             |
| <b>A</b>                | Concentration of particles of the adaptive immune response against phage    | Particles/ml           | -               | -               | -               | -               | -               | $10^4$          | $10^4$          | 10              | 10              |
| <b>B</b>                | Concentration of particles of the adaptive immune response against bacteria | Particles/ml           | -               | -               | -               | -               | -               | 1000            | 1000            | 1000            | 1000            |
| <b>Parameters</b>       |                                                                             |                        |                 |                 |                 |                 |                 |                 |                 |                 |                 |
| <b>a<sub>s</sub></b>    | Growth rate of susceptible bacteria                                         | $h^{-1}$               | 0.7             | 0.7             | 0.7             | 0.7             | 0.7             | 0.7             | 0.7             | 0.7             | 0.7             |
| <b>a<sub>I</sub></b>    | Growth rate of innate immune response                                       | $h^{-1}$               | 0.5             | 0.5             | 0.5             | 0.5             | 0.5             | 0.5             | 0.5             | 0.5             | 0.5             |
| <b>a<sub>A</sub></b>    | Growth rate of adaptive immune response against phage                       | $h^{-1}$               | -               | -               | -               | -               | -               | 0.9             | 0.9             | 0.9             | 0.9             |
| <b>a<sub>B</sub></b>    | Growth rate of adaptive immune response against bacteria                    | $h^{-1}$               | -               | -               | -               | -               | -               | 0.9             | 0.9             | 0.9             | 0.9             |
| <b>d<sub>I</sub></b>    | Decay rate of innate immune response                                        | $h^{-1}$               | 0.5             | 0.5             | 0.5             | 0.5             | 0.5             | 0.5             | 0.5             | 0.5             | 0.5             |
| <b>ρ</b>                | Adsorption rate of phages by susceptible bacteria                           | $ml\ cfu^{-1}\ h^{-1}$ | $10^{-8}$       | $10^{-8}$       | $10^{-8}$       | $10^{-8}$       | $10^{-8}$       | $10^{-8}$       | $10^{-8}$       | $10^{-8}$       | $10^{-8}$       |
| <b>K<sub>SI</sub></b>   | Killing rate of bacteria versus innate immune response                      | $h^{-1}$               | $10^{-6}$       | $10^{-6}$       | $10^{-6}$       | $10^{-6}$       | $10^{-6}$       | $10^{-6}$       | $10^{-6}$       | $10^{-6}$       | $10^{-6}$       |
| <b>K<sub>PI</sub></b>   | Killing rate of phage versus innate immune response                         | $h^{-1}$               | 0               | $10^{-3}$       | $10^{-3}$       | $10^{-3}$       | $10^{-3}$       | $10^{-3}$       | $10^{-3}$       | $10^{-3}$       | $10^{-3}$       |
| <b>K<sub>SB</sub></b>   | killing rate of bacteria versus adaptive immunity                           | $h^{-1}$               | -               | -               | -               | -               | -               | $10^{-3}$       | $10^{-3}$       | $10^{-3}$       | $10^{-3}$       |
| <b>K<sub>PA</sub></b>   | Killing rate of phage versus adaptive immunity                              | $h^{-1}$               | -               | -               | -               | -               | -               | $10^{-3}$       | $10^{-3}$       | $10^{-3}$       | $10^{-3}$       |

Supplementary: *in silico* model

|            |                                                                                                           |              |        |        |        |        |        |        |        |        |        |
|------------|-----------------------------------------------------------------------------------------------------------|--------------|--------|--------|--------|--------|--------|--------|--------|--------|--------|
| $S_c$      | Bacterial concentration above which innate immune response increases                                      | Cfu/ml       | 100    | 100    | 100    | 100    | 100    | 100    | 100    | 100    | 100    |
| $P_c$      | Phage concentration above which innate immune response increases                                          | Pfu/ml       | -      | $10^5$ | -      | -      | $10^5$ | -      | $10^5$ | -      | $10^5$ |
| $\gamma_g$ | Growth rate reduction of innate immune response                                                           |              | -      | -      | -      | -      | -      | -      | -      | -      | -      |
| $k_i$      | Bacterial concentration at which innate immune response actual growth rate is half of its maximum value   | Cfu/ml       | $10^6$ | $10^6$ | $10^6$ | $10^6$ | $10^6$ | $10^6$ | $10^6$ | $10^6$ | $10^6$ |
| $\gamma_d$ | Decay rate reduction of innate immune response                                                            |              | -      | -      | -      | -      | -      | -      | -      | -      | -      |
| $b$        | Phage burst size                                                                                          | Pfu          | 40     | 40     | 40     | 40     | 40     | 40     | 40     | 40     | 40     |
| $\lambda$  | Latent period (average time between phage adsorption and burst)                                           | h            | 0.612  | 0.612  | 0.612  | 0.612  | 0.612  | 0.612  | 0.612  | 0.612  | 0.612  |
| $k_A$      | Phage concentration at which adaptive immune response actual growth rate is half of its maximum value     | Pfu/ml       | -      | -      | -      | -      | -      | $10^5$ | $10^5$ | $10^5$ | $10^5$ |
| $k_B$      | Bacterial concentration at which adaptive immune response actual growth rate is half of its maximum value | Cfu/ml       | -      | -      | -      | -      | -      | $10^5$ | $10^5$ | $10^5$ | $10^5$ |
| $A_{max}$  | Maximum magnitude of A                                                                                    | Particles/ml | -      | -      | -      | -      | -      | $10^6$ | $10^6$ | $10^6$ | $10^6$ |
| $B_{max}$  | Maximum magnitude of B                                                                                    | Particles/ml | -      | -      | -      | -      | -      | $10^6$ | $10^6$ | $10^6$ | $10^6$ |
